# Supplementary material for: SIRT1 Activation Enhancing 8,3′-Neolignans from the Twigs of Corylopsis coreana Uyeki
Source: MDPI journal article supplement (doi:10.3390/plants10081684), 2021-08-16

<Supplementary data>

## **SIRT1 activation enhancing 8,3'-neolignans from the twigs of *Corylopsis coreana* Uyeki**

**Hyun Woo Kim <sup>1,2</sup>, Jin Bum Jeon<sup>1</sup>, Mi Zhang<sup>1</sup>, Hyo-Moon Cho,<sup>1</sup> Byeol Ryu,<sup>1</sup> Ba-Wool Lee,<sup>1</sup> William H. Gerwick,<sup>2,3</sup> and Won Keun Oh <sup>1,\*</sup>**

<sup>1</sup> Korea Bioactive Natural Material Bank, Research Institute of Pharmaceutical Sciences, College of Pharmacy and Research Institute of Pharmaceutical Sciences, Seoul National University

<sup>2</sup> Center for Marine Biotechnology and Biomedicine, Scripps Institution of Oceanography, University of California, San Diego, La Jolla, California 92093, United States

<sup>3</sup> Skaggs School of Pharmacy and Pharmaceutical Sciences, UC San Diego, 9500 Gilman Drive, La Jolla, California 92093, United states

\* Correspondence: wkoh1@snu.ac.kr

## Contents

**Figure S1.** 1D NMR spectra of compound **1** in methanol- $d_4$

**Figure S2.** 2D NMR spectra of compound **1** in methanol- $d_4$

**Figure S3.** UV and ECD spectra of compound **1**

**Figure S4.** 1D NMR spectra of compound **2** in methanol- $d_4$

**Figure S5.** 2D NMR spectra of compound **2** in methanol- $d_4$

**Figure S6.** UV and ECD spectra of compound **2**

**Figure S7.** 1D NMR spectra of compound **3** in methanol- $d_4$

**Figure S8.** 2D NMR spectra of compound **3** in methanol- $d_4$

**Figure S9.** UV and ECD spectra of compound **3**

**Figure S10.** Cell viability of isolated compounds (**1-16**) on the HEK-293 cells

**Figure S1.** 1D NMR spectra of compound **1** in methanol- $d_4$

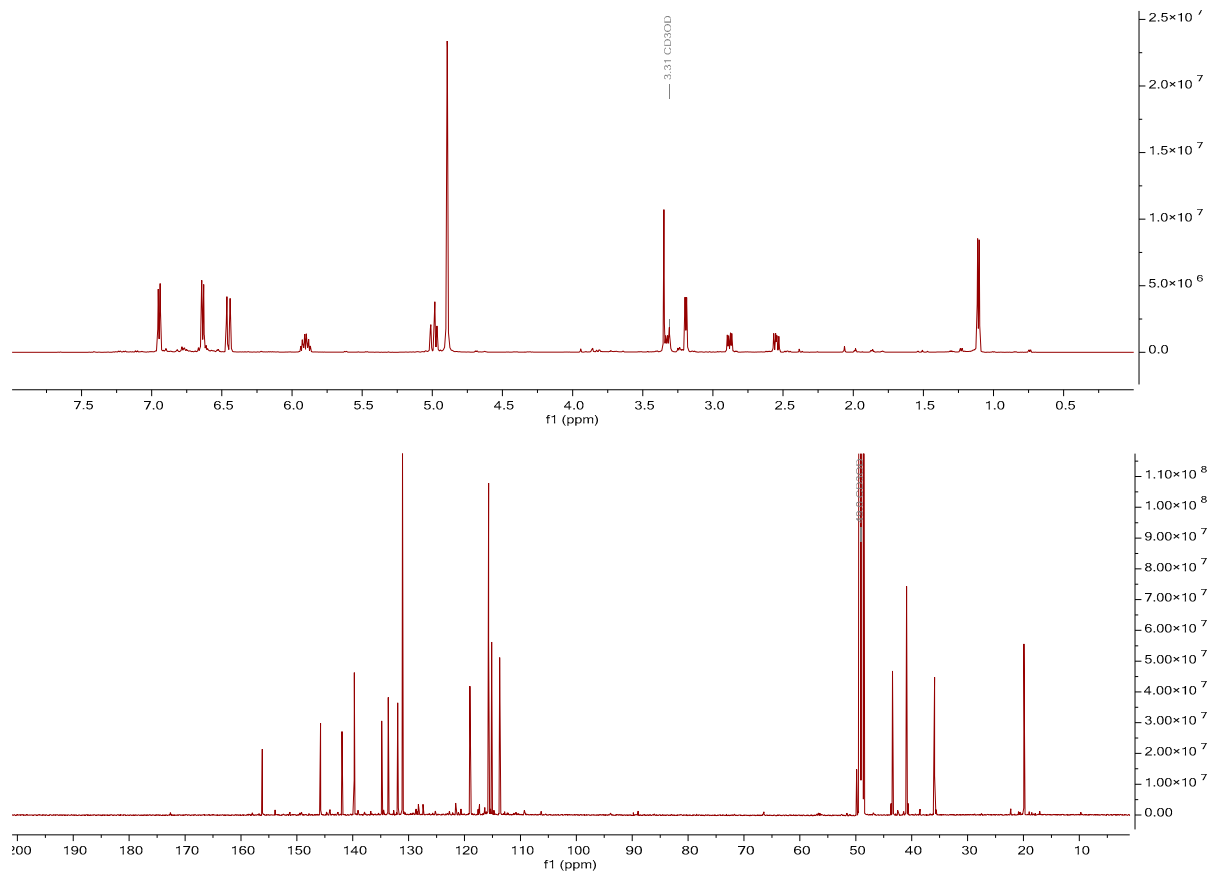

**$^1\text{H}$  and  $^{13}\text{C}$  NMR spectra of compound **1****

**Figure S2.** 2D NMR spectra of compound **1** in methanol- $d_4$

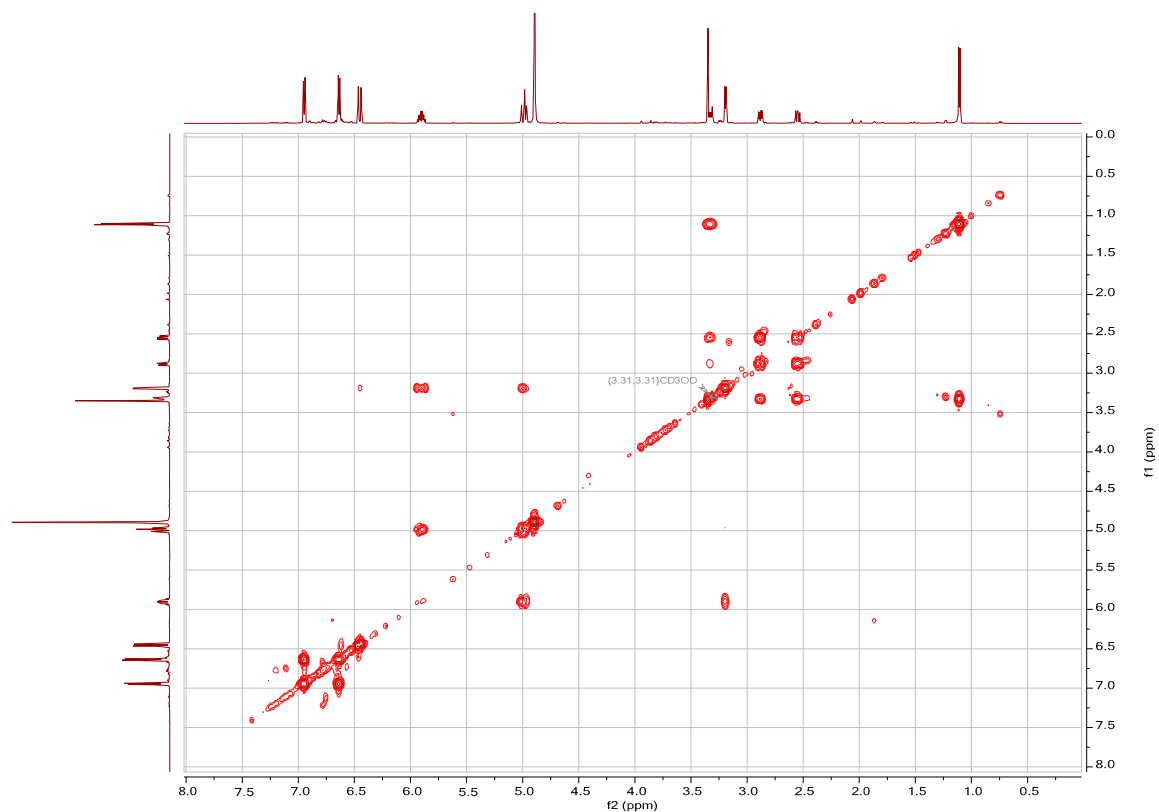

**COSY spectrum of compound 1**

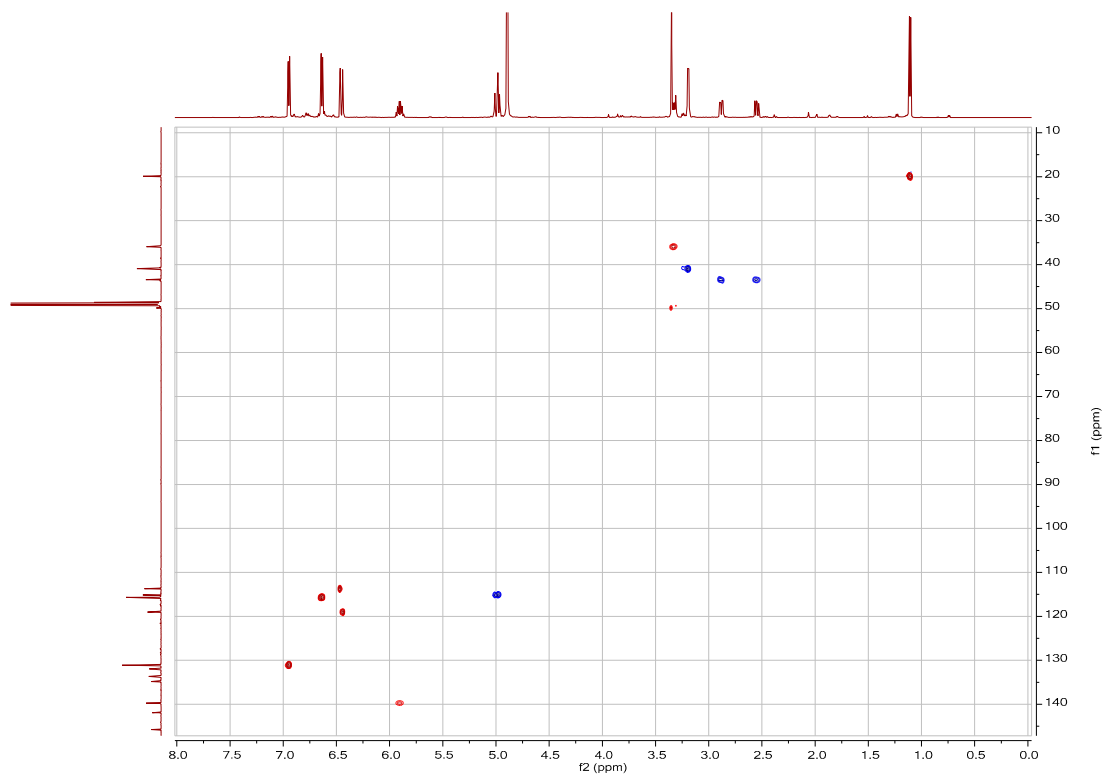

**HSQC spectrum of compound 1**

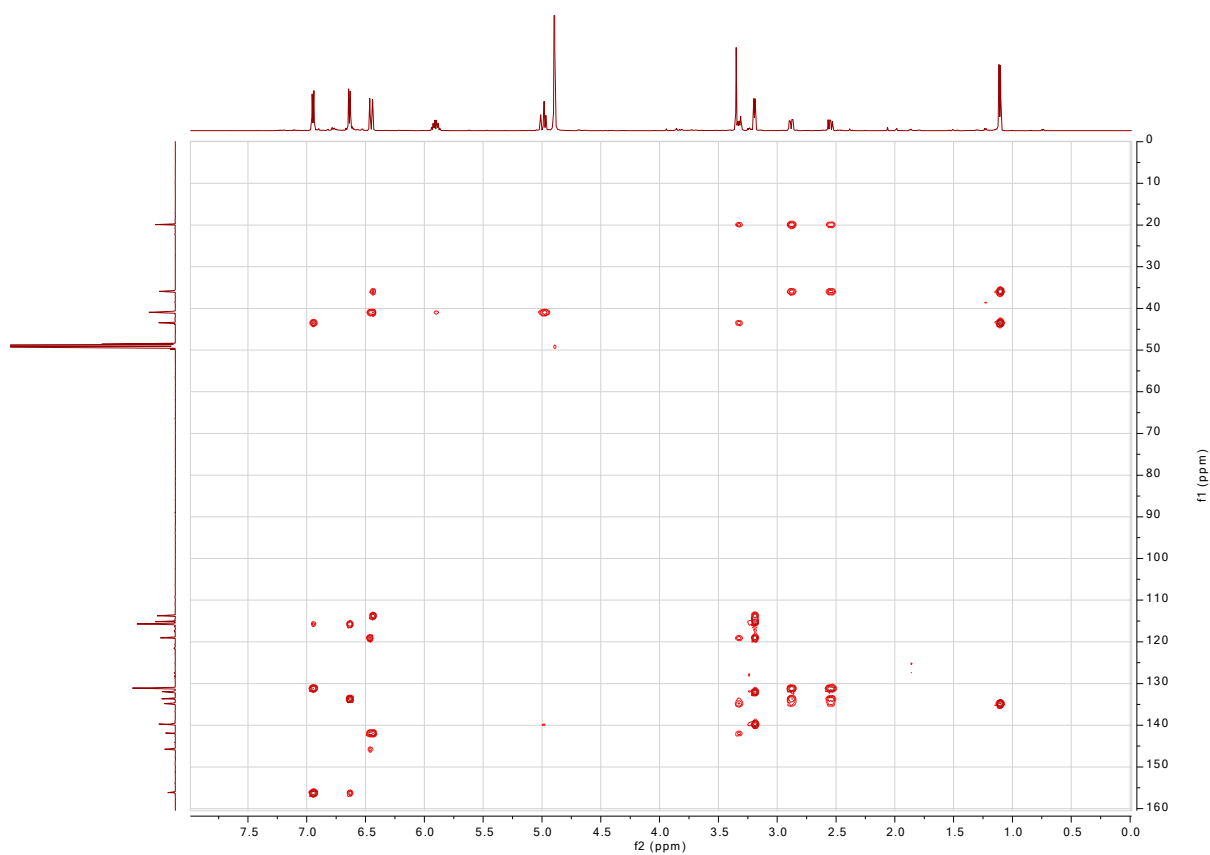

HMBC spectrum of compound 1

Figure S3. UV and ECD spectra of compound 1

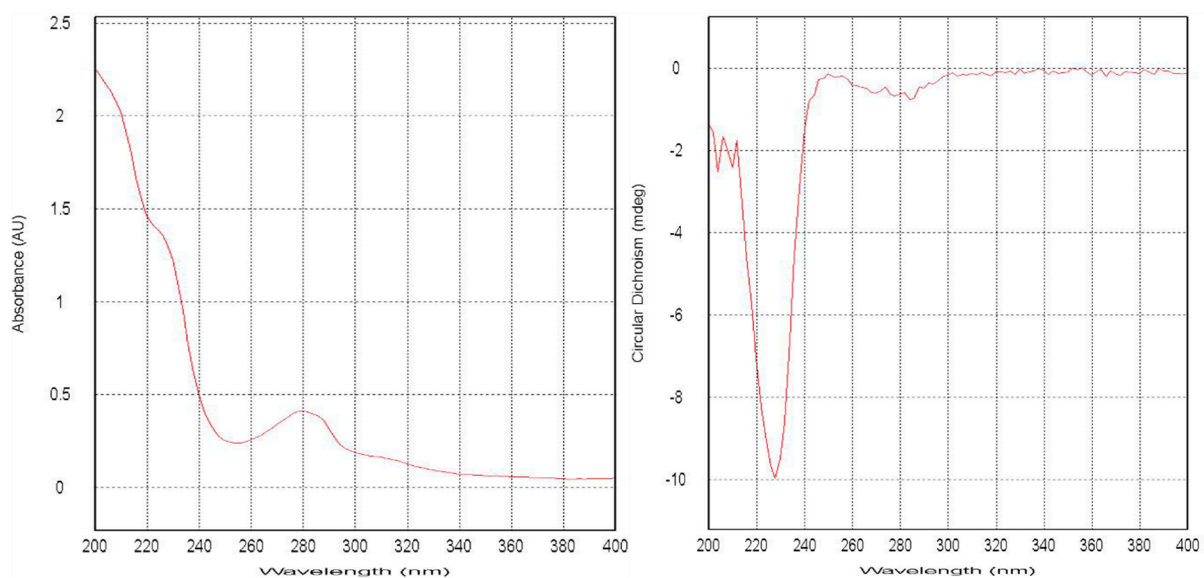

**Figure S4.** 1D NMR spectra of compound **2** in methanol-  $d_4$

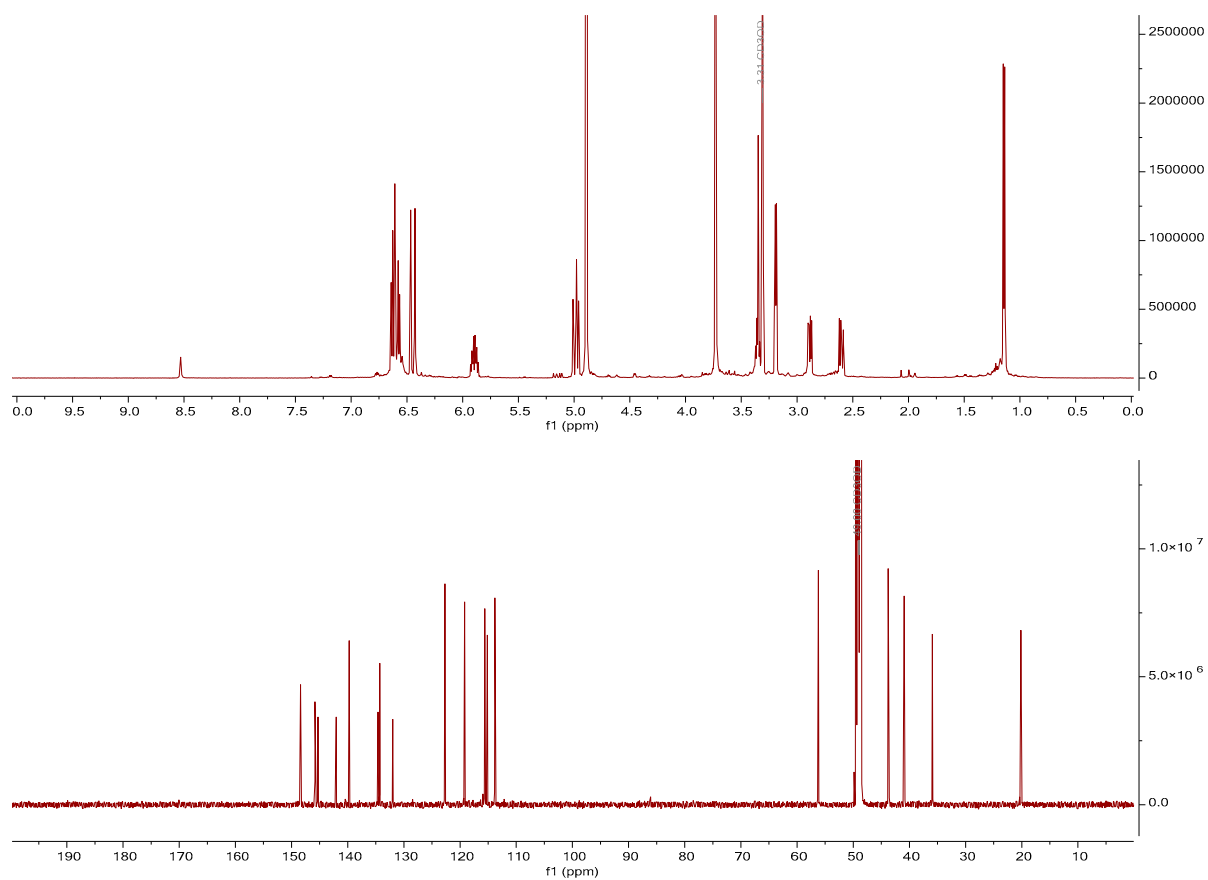

**$^1\text{H}$  and  $^{13}\text{C}$  NMR spectra of compound **2****

**HSQC spectrum of compound 2**

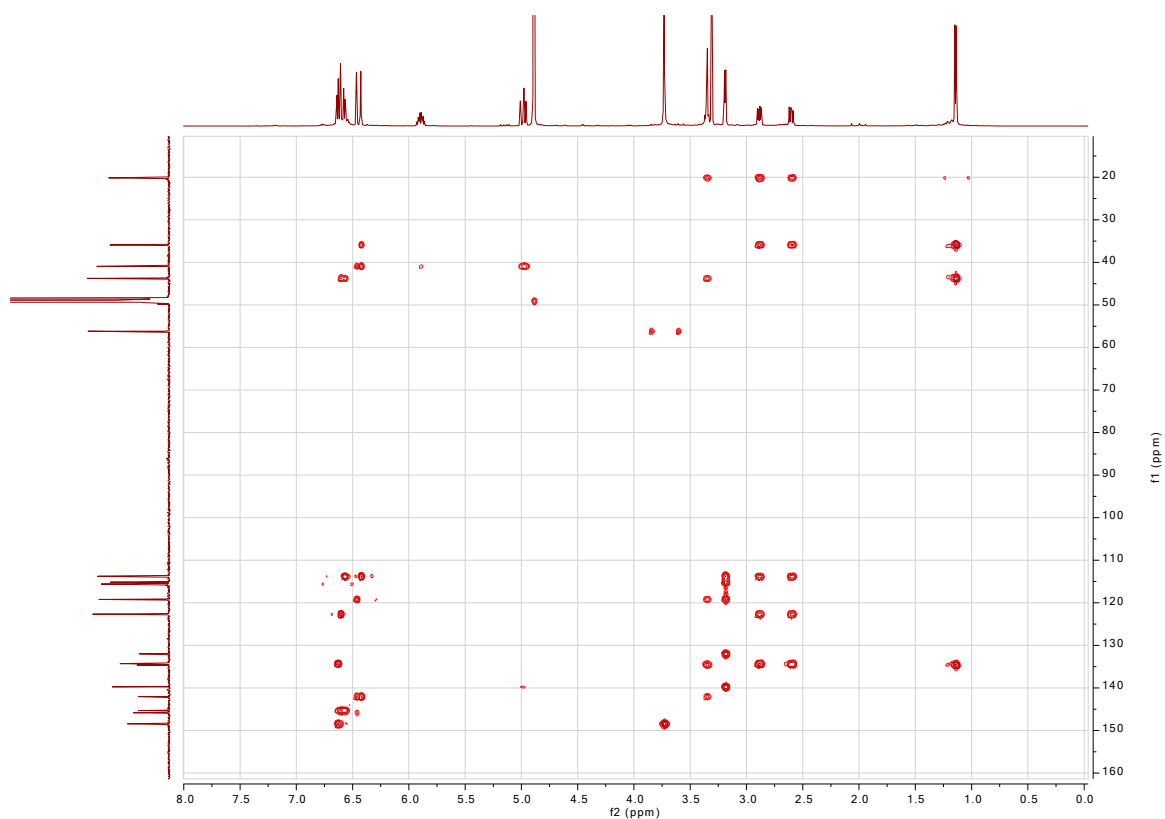

**HMBC spectrum of compound 2**

**Figure S6. UV and ECD spectra of compound 2**

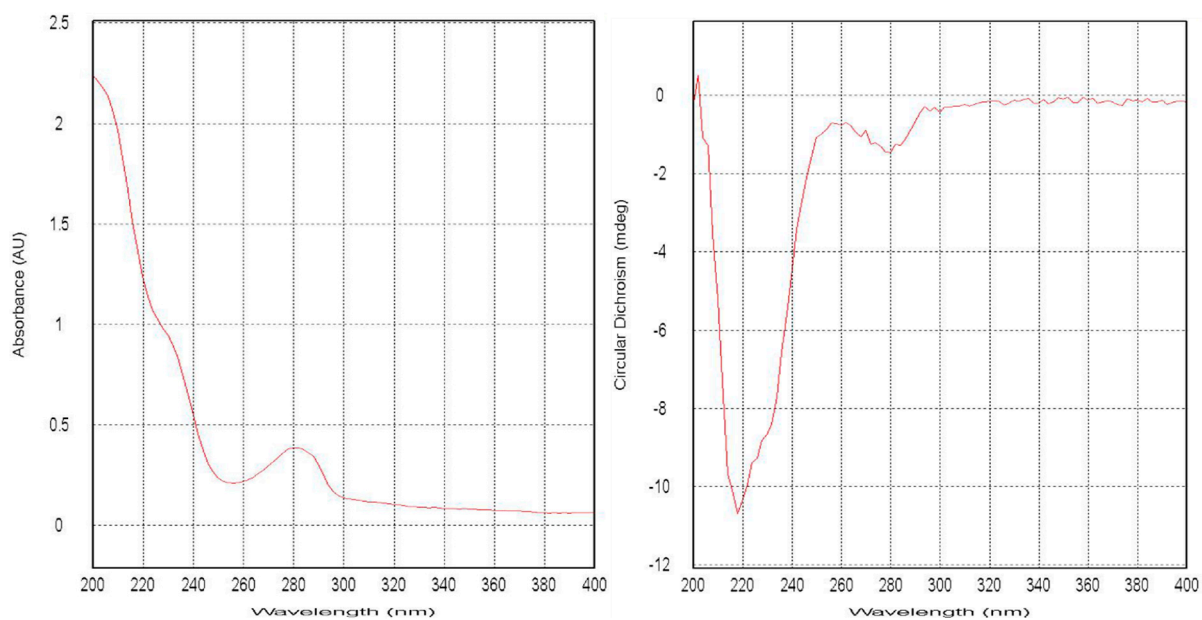



**Figure S7.** 1D NMR spectra of compound **3** in methanol- $d_4$

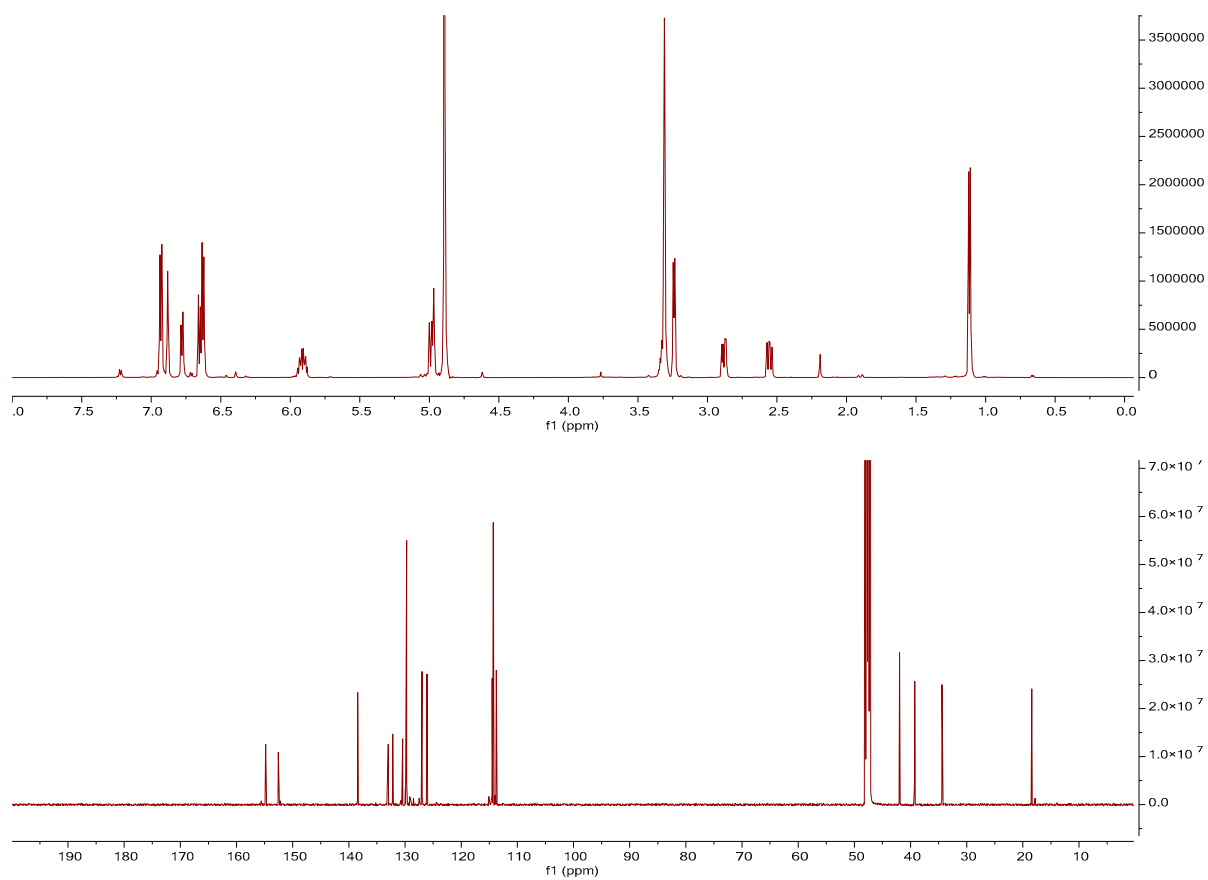

**$^1\text{H}$  and  $^{13}\text{C}$  NMR spectra of compound **3****

### HSQC spectrum of compound 3

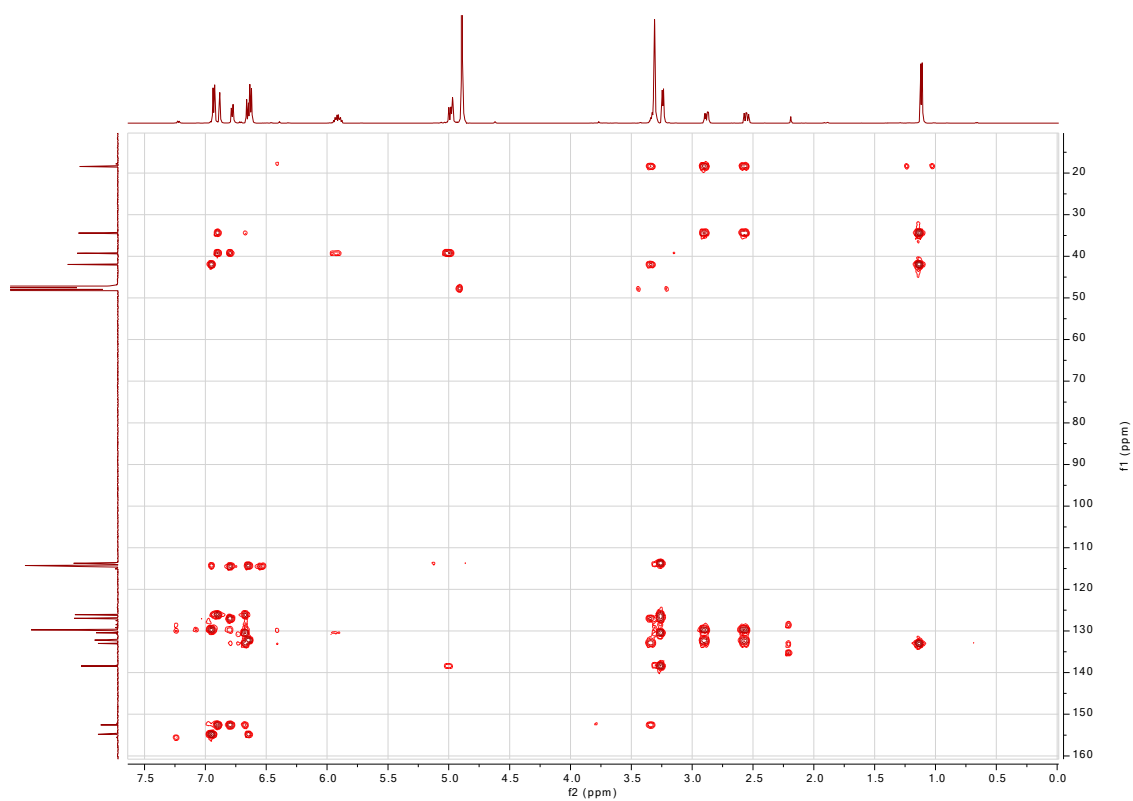

**HMBC spectrum of compound 3**

**Figure S9. UV and ECD spectra of compound 3**

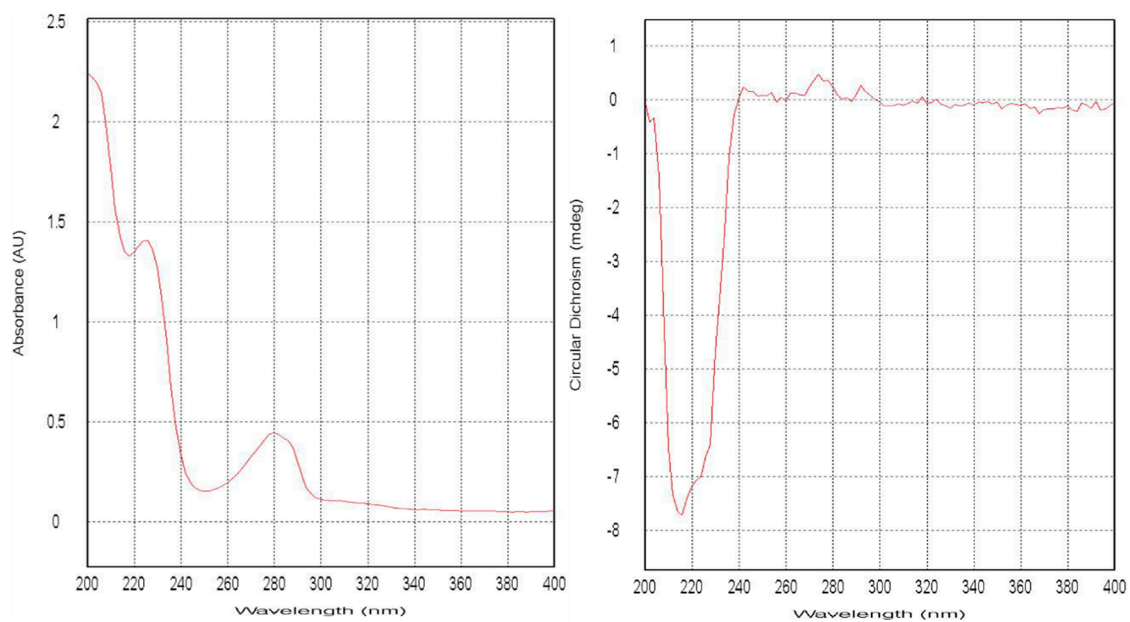

**Figure S10.** Cell viability of isolated compounds (**1-16**) on the HEK-293 cells

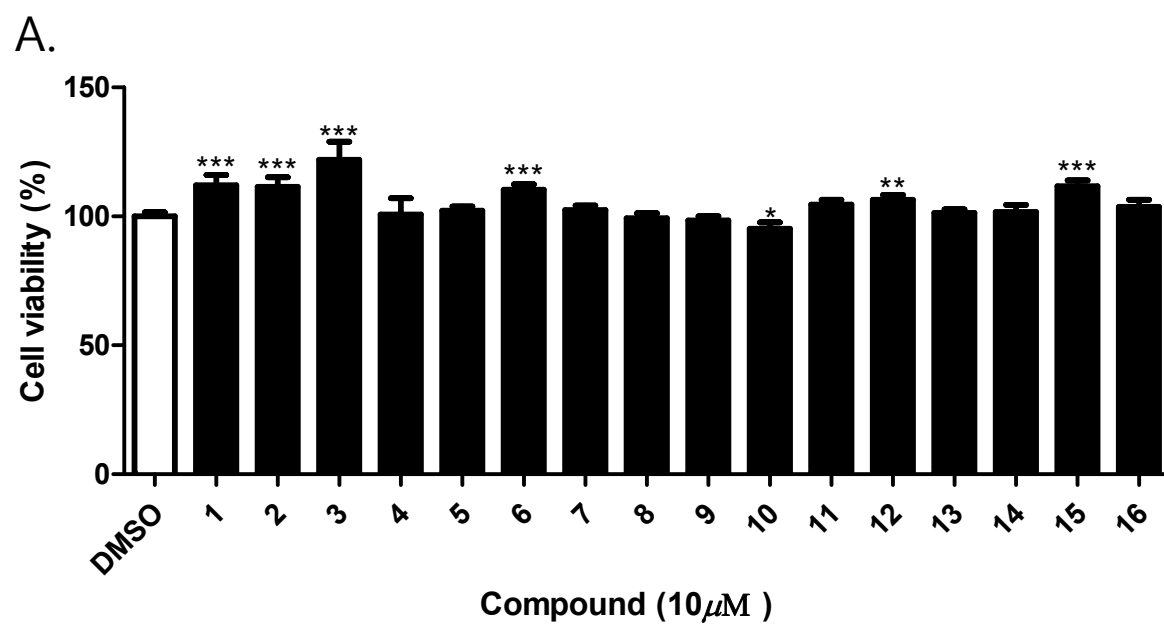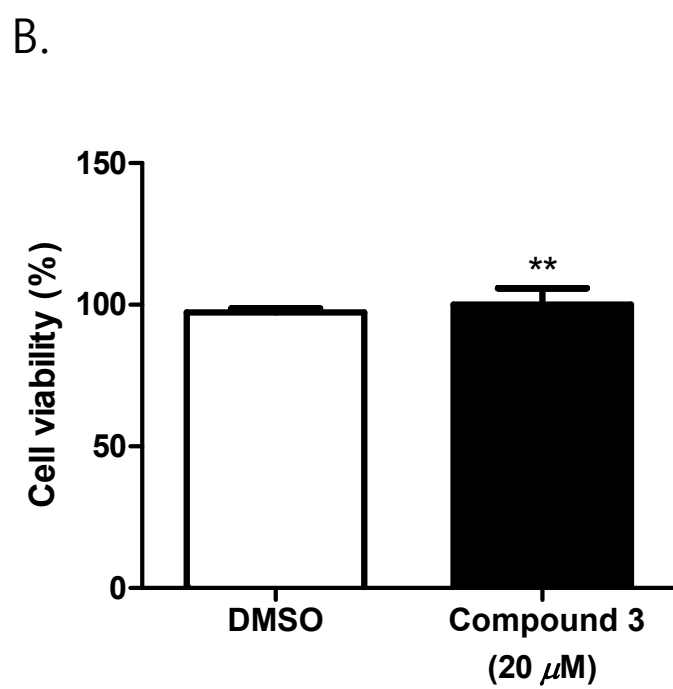

Supplement: s1 [file s1]
